# Supplementary material
Source: publisher figshare collection journal article supplement (https://frontiersin.figshare.com/ndownloader/files/18666431)
Supplement: Supplementary file 1 [file 18666431]

## Sheet: MC-IRM-2012
Position	3.5T IRM	100 mT AF	MC-Suscept		2012 Pilot Study
1	0.004383	0.003608	5.9742e-07
1.5	0.004927	0.00421	6.863e-07
2	0.005765	0.003619	8.04e-07
2.5	0.006148	0.005804	1.031e-06
3	0.006371	0.004481	8.392e-07
3.5	0.009056	0.008337	9.853e-07
4	0.007327	0.006453	9.453e-07
4.5	0.006035	0.005611	8.616e-07
5	0.005946	0.004509	6.434e-07
5.5	0.006357	0.005421	8.564e-07
6	0.003647	0.003368	5.839e-07
6.5	0.004837	0.004497	7.303e-07
7	0.009258	0.007753	1.203e-06
7.5	0.005402	0.005009	7.326e-07
8	0.004373	0.004002	6.537e-07
8.5	0.00536	0.004982	7.203e-07
9	0.006273	0.005963	8.035e-07
9.5	0.003385	0.002723	6.95e-07
10	0.008604	0.008154	9.024e-07
10.5	0.00598	0.005585	8.639e-07
11	0.008332	0.007859	8.767e-07
11.5	0.006324	0.005148	8.395e-07
12.5	0.005649	0.005417	7.128e-07
13	0.00518	0.00432	7.532e-07
13.5	0.007072	0.005288	9.227e-07
14	0.006388	0.005299	7.21e-07
14.5	0.004646	0.003024	7.754e-07
15	0.005015	0.004135	7.008e-07
15.5	0.003355	0.00309	6.578e-07
16	0.005187	0.004868	7.55e-07
16.5	0.00709	0.006308	8.802e-07
17	0.005728	0.005381	8.045e-07
17.5	0.004308	0.003938	7.877e-07
18	0.005598	0.005298	1.347e-06
18.5	0.007214	0.006909	1.045e-06
19	0.008344	0.007869	1.096e-06
19.5	0.00457	0.004249	9.838e-07
20	0.006284	0.005941	6.621e-07
20.5	0.001774	0.001546	8.16e-07
21	0.004683	0.004384	7.548e-07
21.5	0.003593	0.003324	8.037e-07
22	0.004147	0.003897	8.268e-07
22.5	0.005043	0.004791	7.343e-07
23	0.0048	0.004564	9.971e-07
23.5	0.008927	0.008089	7.442e-07
24	0.005533	0.005284	9.191e-07
24.5	0.004986	0.004721	8.344e-07
25	0.007623	0.007365	8.865e-07
25.5	0.007268	0.006952	2.051e-07
26	0.001679	0.001442	2.617e-07
26.5	0.001115	0.0009667	3.152e-07
27	0.001415	0.001313	2.33e-07
27.5	0.001107	0.0009318	5.261e-07
28	0.001148	0.0009014	3.63e-07
28.5	0.0009396	0.0007891	2.42e-07
29	0.001212	0.001106	3.794e-07
29.5	0.001601	0.001407	3.027e-07
30	0.00105	0.0009335	8.343e-07
30.5	0.007751	0.007415	1.602e-06
31	0.005926	0.005536	1.069e-06
31.5	0.006147	0.005719	9.989e-07
32	0.006654	0.005654	1.115e-06
32.5	0.004915	0.004475	1.258e-06
33	0.007861	0.007565	8.07e-07
33.5	0.005883	0.005509	4.401e-07
34	0.003136	0.002768	4.918e-07
34.5	0.002698	0.002439	2.748e-07
35	0.001678	0.001491	3.304e-07
35.5	0.001942	0.001818	5.171e-07
36	0.003529	0.003255	8.031e-07
36.5	0.006608	0.006302	7.764e-07
37	0.007587	0.007096	7.401e-07
37.5	0.00409	0.003855	8.332e-07
38	0.006786	0.006251	6.946e-07
38.5	0.003894	0.003677	8.121e-07
39	0.004896	0.00458	8.583e-07
39.5	0.006348	0.006074	4.373e-07
40	0.002634	0.002462
